# Supplementary material
Source: PubMed Central journal article supplement (PMC6062386)
Supplement: TX-006-C7TX00163K-s001.pdf [file TX-006-C7TX00163K-s001.pdf]

**Table S1. Details of the primers used in MeDIP and HmeDIP experiments.**

| Primer Name | Sequence (5'→3')                    | Amplified region                   |
|-------------|-------------------------------------|------------------------------------|
| Primer-1    | GTTTCCCAGTCACGGTC*T                 |                                    |
| Primer-2    | **GACCGTGACTGGGAAAC                 | -                                  |
| Primer-3    | GTTTCCCAGTCACGGTC                   |                                    |
| Nega-Fw     | GAGCATCTTCTCACATCCATCTGGCACACATTACT | chr18:8760558-8760642, strand=-    |
| Nega-Rv     | ATGTGGGAGATGTTTCTAGTGTGGGAGTTGGGAA  |                                    |
| Cyp2b10-Fw  | AAATGATTCTGGTGCTGGGTGCCATGGTATATG   | chr7:25890767-25890851 strand=+    |
| Cyp2b10-Rv  | CAAAGTTATAGCGATTCCCCTGCCTCTGCTTC    |                                    |
| Actb-Fw     | GTCAAGATCCATGAAAACCTCTCCAACCAGAGTTC | chr5:142907278-142907365 strand=-  |
| Actb-Rv     | CCTTCTGCTGTGGTTCTAATTTGCTAGGTGTGTTG |                                    |
| H19-Fw      | GTGAGTCTCCTTCTTCTCTCTTGGCCTCGCTCCAC | chr7:142577685-142577764 strand=-  |
| H19-Rv      | TTCTTCTCACCAGGCCCTCTCTAAACCTTCGTT   |                                    |
| Tex19.1-Fw  | CTCATGGGAGATATGTAAATGAGCTGGAGCATCG  | chr11:121146077-121146166 strand=+ |
| Tex19.1-Rv  | GCTAAGCACTGAACACCAGGGAGGACGAAC      |                                    |

\* indicates a phosphothioate internucleoside linkage.

\*\* indicates a 5'-phosphorylation site.

**Table S2. Mortality, body and liver weight, food consumption, overall PB intake during treatment and plasma PB concentration in animals treated with PB for 27 weeks.**

| C3H/HeNCrlCrlj mice                                     |                |      |      |
|---------------------------------------------------------|----------------|------|------|
|                                                         |                | (n)  | Fold |
| <i>Mortality (number of death)</i>                      |                |      |      |
| PB 0 ppm                                                | 0              | (20) |      |
| PB 500ppm                                               | 1              | (20) |      |
| <i>Body weight at commencement of treatment (g)</i>     |                |      |      |
| Control 0 ppm                                           | 21.0 ± 1.1     | (20) |      |
| PB 500ppm                                               | 21.0 ± 1.1     | (19) |      |
| <i>Body weight at termination of treatment (g)</i>      |                |      |      |
| Control 0 ppm                                           | 31.1 ± 2.5     | (20) |      |
| PB 500ppm                                               | 31.8 ± 1.8     | (19) |      |
| <i>Total body weight gain (g)</i>                       |                |      |      |
| Control 0 ppm                                           | 13.6 ± 2.3     | (20) |      |
| PB 500ppm                                               | 13.5 ± 1.6     | (19) |      |
| <i>Absolute liver weight (g)</i>                        |                |      |      |
| Control 0 ppm                                           | 1.59 ± 0.11    | (20) | 1.0  |
| PB 500ppm                                               | 2.33 ± 0.60 ** | (19) | 1.5  |
| <i>Relative liver weight (g/100 g)</i>                  |                |      |      |
| Control 0 ppm                                           | 5.06 ± 0.20    | (20) | 1.0  |
| PB 500ppm                                               | 7.23 ± 1.71 ** | (19) | 1.4  |
| <i>Food consumption at termination of treatment (g)</i> |                |      |      |
| Control 0 ppm                                           | 4.0 ± 0.3      | (18) |      |
| PB 500ppm                                               | 3.9 ± 1.1      | (19) |      |
| <i>Test article intake (mg/kg/day, average)</i>         |                |      |      |
| PB 500ppm                                               | 69.9           | (5)  |      |
| <i>Plasma concentration levels of PB (µg/mL)</i>        |                |      |      |
|                                                         | 15.4 ± 7.1     | (19) |      |

Results are presented as mean±SD.

Values significantly different from control (0 ppm) are: \*p<0.05 and \*\*p<0.01.

**Table S3. Summary of necropsy and histopathological findings of liver in animals treated with PB for 27 weeks.**

**C3H/HeNCrIcrlj mice /male**

| Organs, Tissues           | Findings                                   | Test article<br>Dose<br>Number of Animals | Control | PB             |
|---------------------------|--------------------------------------------|-------------------------------------------|---------|----------------|
|                           |                                            |                                           | (20)    | 500ppm<br>(19) |
| Liver                     |                                            |                                           | (20)    | (19)           |
|                           | Within normal limits                       |                                           | [ 3]    | [ 0]           |
| Necropsy                  | Dark red focus                             |                                           | [ 1]    | [11]           |
|                           |                                            | P                                         | 1       | 11             |
|                           | Enlarged                                   |                                           | [ 0]    | [ 1]           |
|                           |                                            | P                                         | 0       | 1              |
|                           | Grayish-white focus                        |                                           | [ 0]    | [ 1]           |
|                           |                                            | P                                         | 0       | 1              |
|                           | Mass                                       |                                           | [ 3]    | [16]           |
|                           |                                            | P                                         | 3       | 16             |
|                           | White focus                                |                                           | [16]    | [19]           |
|                           |                                            | P                                         | 16      | 19             |
| Histopathology            | Adenocarcinoma                             |                                           | [ 0]    | [ 3]           |
|                           |                                            | U                                         | 0       | 3              |
|                           | Adenoma, hepatocellular                    |                                           | [ 7]    | [19]           |
|                           |                                            | U                                         | 7       | 19             |
|                           | Focus of cellular alteration, basophilic   |                                           | [ 8]    | [13]           |
|                           |                                            | ±                                         | 7       | 12             |
|                           |                                            | +                                         | 1       | 1              |
|                           | Focus of cellular alteration, clear cell   |                                           | [10]    | [15]           |
|                           |                                            | ±                                         | 9       | 15             |
|                           |                                            | +                                         | 1       | 0              |
|                           | Focus of cellular alteration, eosinophilic |                                           | [ 1]    | [19]           |
|                           |                                            | ±                                         | 1       | 14             |
|                           |                                            | +                                         | 0       | 5              |
|                           | Focus of cellular alteration, mixed cell   |                                           | [ 1]    | [ 0]           |
|                           |                                            | ±                                         | 1       | 0              |
|                           | Hypertrophy, hepatocyte, centrilobular     |                                           | [ 3]    | [19]           |
|                           | ±                                          | 3                                         | 0       |                |
|                           | +                                          | 0                                         | 19      |                |
| Infiltration, mononuclear |                                            | [ 1]                                      | [ 0]    |                |
|                           | ±                                          | 1                                         | 0       |                |
| Mineralization            |                                            | [ 3]                                      | [ 0]    |                |
|                           | ±                                          | 3                                         | 0       |                |
| Necrosis, single cell     |                                            | [ 0]                                      | [ 1]    |                |
|                           | ±                                          | 0                                         | 1       |                |

P: Present, ±: Slight, +:Mild, U: Undetermined

**Table S4. Summary of individual histopathological findings of liver in animals used in DNA modification and gene expression analyses.**

**C3H/HeNCrIcrIj mice /male**

| Organs, Tissues<br>Findings                | Test article<br>Dose<br>Animal No. | Control<br>0 ppm |   |   | PB<br>500 ppm |   |   |
|--------------------------------------------|------------------------------------|------------------|---|---|---------------|---|---|
|                                            |                                    | 1                | 2 | 3 | 1             | 2 | 3 |
| Liver                                      |                                    | N                | N | N | Y             | Y | Y |
| Adenoma, hepatocellular                    |                                    | -                | - | - | P             | P | P |
| Focus of cellular alteration, basophilic   |                                    | -                | - | - | ±             | ± | ± |
| Focus of cellular alteration, clear cell   |                                    | -                | - | - | ±             | ± | ± |
| Focus of cellular alteration, eosinophilic |                                    | -                | - | - | ±             | ± | ± |
| Hypertrophy, hepatocyte, centrilobular     |                                    | -                | - | - | +             | + | + |

Y: Findings present, N: Within normal limits

-: Within normal limits, ±: Slight, +: Mild, P: Present

Table S5. Overlap between hypo-5mC & up-regulated genes of hepatocellular adenoma induced by DEN/PB in C3H mice, up-regulated genes of liver induced by PB in CD-1 mice and/or in chimeric mice with human hepatocytes (Yamada et al., 2014).

**[Overlapped between hepatocellular adenoma in C3H mice and liver in CD-1 mice but not in chimeric mice with human hepatocytes]**

| Gene Symbol<br>(mouse) | C3H mice (Hypo-5mC) |                        | C3H mice (Upregulated) |             | CD-1 mice |             | Agilent GO |
|------------------------|---------------------|------------------------|------------------------|-------------|-----------|-------------|------------|
|                        | p-value(region)     | MAT-score <sup>†</sup> | p-value                | Fold-Change | p-value   | Fold-Change |            |
| Amot                   | 1.02E-03            | -4.016                 | 5.01E-03               | 1.756       | 3.56E-02  | 2.532       | n          |
| Cblb                   | 9.52E-03            | -3.089                 | 4.21E-02               | 2.155       | 3.80E-02  | 2.015       | b          |
| Ccdc85b                | 6.52E-03            | -3.257                 | 7.77E-03               | 1.617       | 8.09E-03  | 3.326       | d          |
| Cdca8                  | 6.31E-03            | -3.275                 | 1.13E-03               | 7.887       | 3.46E-02  | 2.667       | n          |
| Gstt3                  | 8.18E-03            | -3.161                 | 3.25E-03               | 2.305       | 4.35E-02  | 6.897       | n          |
| Mctp2                  | 7.54E-03            | -3.192                 | 1.74E-02               | 1.403       | 4.15E-02  | 2.435       | n          |
| Mical1                 | 4.22E-03            | -3.454                 | 4.50E-02               | 2.783       | 4.87E-02  | 37.038      | n          |
| Prg4                   | 6.86E-03            | -3.238                 | 1.09E-02               | 1.771       | 4.99E-03  | 3.204       | a, b       |
| Racgap1                | 4.59E-04            | -4.336                 | 3.67E-03               | 11.474      | 1.75E-02  | 2.591       | n          |
| Rbp1                   | 8.20E-03            | -3.158                 | 5.20E-04               | 4.768       | 1.59E-02  | 3.272       | n          |
| Slco1a4                | 3.30E-03            | -3.559                 | 1.92E-03               | 2.498       | 1.18E-02  | 2.418       | n          |

**[Overlapped between hepatocellular adenoma in C3H mice and liver in chimeric mice with human hepatocytes but not in CD-1 mice]**

| Gene Symbol<br>(mouse) | C3H mice (Hypo-5mC) |                        | C3H mice (Upregulated) |             | Gene Symbol<br>(human) | Chimeric mice |             | Agilent GO |
|------------------------|---------------------|------------------------|------------------------|-------------|------------------------|---------------|-------------|------------|
|                        | p-value(region)     | MAT-score <sup>†</sup> | p-value                | Fold-Change |                        | p-value       | Fold-Change |            |
| Abcc2                  | 9.90E-03            | -3.069                 | 7.55E-05               | 2.234       | ABCC2                  | 3.02E-04      | 2.066       | n          |
| Fbxo15                 | 8.30E-03            | -3.151                 | 6.46E-03               | 6.320       | FBXO15                 | 1.60E-02      | 4.164       | n          |
| Fmo1                   | 5.27E-03            | -3.353                 | 4.36E-03               | 2.103       | FMO1                   | 3.05E-02      | 2.224       | n          |
| Gpx2                   | 7.62E-03            | -3.189                 | 1.51E-02               | 33.192      | GPX2                   | 2.89E-04      | 6.151       | n          |
| Nqo1                   | 9.25E-03            | -3.101                 | 3.39E-04               | 6.660       | NQO1                   | 7.54E-03      | 19.218      | n          |
| Sgk2                   | 8.75E-03            | -3.126                 | 6.66E-03               | 2.319       | SGK2                   | 1.62E-02      | 2.386       | n          |

**[Overlapped between liver in CD-1 mice and chimeric mice with human hepatocytes but not hepatocellular adenoma in C3H mice]**

| Gene Symbol<br>(mouse) | CD-1 mice |             | Gene Symbol<br>(human) | Chimeric mice |             | Agilent GO |
|------------------------|-----------|-------------|------------------------|---------------|-------------|------------|
|                        | p-value   | Fold-Change |                        | p-value       | Fold-Change |            |
| Cyp2a4                 | 4.08E-02  | 17.942      | CYP2A7                 | 8.58E-04      | 5.251       | n          |
| Cyp2b10                | 3.49E-02  | 118.828     | CYP2B6                 | 1.57E-04      | 7.148       | n          |
| Cyp2c54                | 1.26E-02  | 7.972       | CYP2C19                | 4.64E-04      | 2.225       | n          |
| Cyp3a16                | 1.14E-02  | 3.354       | CYP3A4                 | 2.37E-04      | 3.169       | n          |
| Ephx1                  | 3.06E-02  | 2.985       | EPHX1                  | 1.04E-04      | 2.475       | n          |
| Gstm2                  | 1.68E-02  | 10.352      | GSTM1                  | 1.88E-02      | 3.951       | n          |
| Gtdc1                  | 1.21E-02  | 2.440       | GTDC1                  | 1.99E-04      | 6.582       | n          |
| Mpv17l                 | 4.07E-02  | 2.422       | MPV17L                 | 2.72E-02      | 2.000       | n          |
| Tfrc                   | 4.88E-03  | 2.333       | TFRC                   | 1.07E-03      | 2.949       | n          |

<sup>†</sup>The relative methylation level calculated by the MAT (Model based Analysis of Tiling-arrays) algorithm

a: With the Gene Ontology (GO) term "cell proliferation" and/or its lower tiers

b: With the GO term "regulation of cell proliferation" and/or its lower tiers

c: With the GO term "cell growth" and/or its lower tiers

d: With the GO term "regulation of cell growth" and/or its lower tiers

n: Without any of the GO term above

Table S6. Overlap between hypo/hyper-5hmC & up-regulated genes of hepatocellular adenoma induced by DEN/PB in C3H mice, up-regulated genes of liver induced by PB in CD-1 mice and/or in chimeric mice with human hepatocytes (Yamada et al., 2014).

| [Overlapped between hepatocellular adenoma in C3H mice and liver in CD-1 mice but not in chimeric mice with human hepatocytes] |                       |                        |                 |                        |          |             |                        |             |           |             |            |
|--------------------------------------------------------------------------------------------------------------------------------|-----------------------|------------------------|-----------------|------------------------|----------|-------------|------------------------|-------------|-----------|-------------|------------|
| Gene                                                                                                                           | C3H mice (Hyper-5hmC) |                        |                 | C3H mice (Hypo-5hmC)   |          |             | C3H mice (Upregulated) |             | CD-1 mice |             | Agilent GO |
| Symbol                                                                                                                         | p-value(region)       | MAT-score <sup>1</sup> | p-value(region) | MAT-score <sup>1</sup> | p-value  | Fold-Change | p-value                | Fold-Change | p-value   | Fold-Change |            |
| 1700016H13Rl                                                                                                                   | —                     | —                      | 4.77E-03        | -3.775                 | 5.13E-03 | 4.096       | 2.08E-02               | 2.020       | —         | —           | n          |
| 2010012O05Rl                                                                                                                   | —                     | —                      | 2.38E-04        | -5.035                 | 4.79E-02 | 1.433       | 1.21E-03               | 2.005       | —         | —           | n          |
| Abcc3                                                                                                                          | —                     | —                      | 8.83E-06        | -7.846                 | 1.28E-02 | 1.537       | 3.95E-02               | 2.337       | —         | —           | n          |
| Abcc4                                                                                                                          | 2.33E-03              | 4.113                  | —               | —                      | 8.93E-05 | 104.220     | 4.70E-02               | 7.349       | —         | —           | b          |
| Akr1b7                                                                                                                         | —                     | —                      | 5.95E-03        | -3.679                 | 1.29E-03 | 90.527      | 2.66E-02               | 52.057      | —         | —           | n          |
| Amot                                                                                                                           | 5.21E-03              | 3.688                  | 8.83E-06        | -7.297                 | 5.01E-03 | 1.756       | 3.56E-02               | 2.532       | —         | —           | n          |
| BC021614                                                                                                                       | —                     | —                      | 8.83E-06        | -11.135                | 3.51E-02 | 1.460       | 1.50E-04               | 2.214       | —         | —           | n          |
| Big3                                                                                                                           | 1.96E-03              | 4.183                  | —               | —                      | 1.38E-03 | 3.845       | 1.22E-02               | 2.193       | —         | —           | n          |
| Cblb                                                                                                                           | 1.27E-03              | 4.403                  | —               | —                      | 4.21E-02 | 2.155       | 3.80E-02               | 2.015       | —         | —           | b          |
| Cbr3                                                                                                                           | —                     | —                      | 8.29E-03        | -3.507                 | 2.83E-05 | 13.245      | 4.86E-02               | 7.296       | —         | —           | n          |
| Cdca8                                                                                                                          | —                     | —                      | 9.71E-05        | -5.307                 | 1.19E-03 | 7.887       | 3.46E-02               | 2.667       | —         | —           | n          |
| Ces2c                                                                                                                          | —                     | —                      | 7.42E-03        | -3.569                 | 1.41E-03 | 5.397       | 4.81E-03               | 5.664       | —         | —           | n          |
| Cidec                                                                                                                          | —                     | —                      | 8.83E-06        | -7.176                 | 2.45E-02 | 4.934       | 9.39E-03               | 3.520       | —         | —           | n          |
| Cks1b                                                                                                                          | 2.82E-04              | 5.052                  | —               | —                      | 1.60E-02 | 2.038       | 6.63E-03               | 2.177       | —         | —           | n          |
| Gm3448                                                                                                                         | 3.23E-03              | 3.947                  | 8.83E-06        | -8.073                 | 1.56E-02 | 1.855       | 2.29E-03               | 2.712       | —         | —           | n          |
| Gsta2                                                                                                                          | —                     | —                      | 2.30E-04        | -5.076                 | 1.43E-03 | 2.670       | 1.97E-02               | 17.260      | —         | —           | n          |
| Gstm1                                                                                                                          | —                     | —                      | 1.06E-03        | -4.510                 | 8.75E-05 | 2.500       | 9.99E-03               | 7.746       | —         | —           | n          |
| Gstm3                                                                                                                          | 3.06E-03              | 3.974                  | 1.59E-04        | -5.197                 | 1.42E-05 | 4.705       | 2.02E-02               | 44.622      | —         | —           | n          |
| Gstm4                                                                                                                          | —                     | —                      | 8.83E-06        | -6.002                 | 8.75E-04 | 4.710       | 1.69E-02               | 5.521       | —         | —           | n          |
| Gstm5                                                                                                                          | —                     | —                      | 1.88E-03        | -4.223                 | 1.88E-02 | 2.223       | 4.24E-03               | 5.503       | —         | —           | n          |
| Gstt3                                                                                                                          | —                     | —                      | 8.83E-06        | -12.018                | 3.25E-03 | 2.305       | 4.35E-02               | 6.897       | —         | —           | n          |
| Gyg                                                                                                                            | 2.96E-03              | 3.992                  | —               | —                      | 1.19E-02 | 2.081       | 1.73E-03               | 2.314       | —         | —           | n          |
| Krt31                                                                                                                          | 5.38E-04              | 4.794                  | —               | —                      | 2.56E-04 | 12.291      | 1.12E-02               | 3.758       | —         | —           | n          |
| Morc4                                                                                                                          | 4.64E-03              | 3.750                  | —               | —                      | 9.61E-03 | 2.845       | 5.92E-03               | 3.465       | —         | —           | n          |
| Oim3                                                                                                                           | —                     | —                      | 8.83E-06        | -6.140                 | 8.70E-05 | 6.412       | 1.13E-03               | 3.062       | —         | —           | n          |
| Pnlpp1                                                                                                                         | 8.60E-03              | 3.470                  | —               | —                      | 4.11E-04 | 2148.926    | 1.07E-02               | 6.728       | —         | —           | n          |
| Prg4                                                                                                                           | —                     | —                      | 6.05E-03        | -3.669                 | 1.09E-02 | 1.771       | 4.99E-03               | 3.204       | —         | —           | a, b       |
| Prss8                                                                                                                          | —                     | —                      | 8.83E-06        | -6.285                 | 1.74E-06 | 18.729      | 3.77E-02               | 3.359       | —         | —           | n          |
| Serpina6                                                                                                                       | 1.97E-03              | 4.182                  | —               | —                      | 2.09E-03 | 3.532       | 4.74E-02               | 5.072       | —         | —           | n          |
| Slc20a1                                                                                                                        | —                     | —                      | 2.03E-03        | -4.179                 | 8.09E-04 | 3.754       | 2.85E-02               | 2.204       | —         | —           | n          |
| Smpd3                                                                                                                          | 9.24E-03              | 3.429                  | —               | —                      | 5.95E-03 | 8.679       | 3.38E-02               | 3.410       | —         | —           | n          |
| Sort1                                                                                                                          | 8.67E-03              | 3.465                  | —               | —                      | 4.96E-02 | 2.202       | 6.69E-04               | 2.667       | —         | —           | n          |
| Syng4                                                                                                                          | 4.19E-03              | 3.797                  | 1.94E-03        | -4.206                 | 3.43E-02 | 1.912       | 1.99E-03               | 2.322       | —         | —           | n          |
| Tff1                                                                                                                           | 2.22E-03              | 4.133                  | 8.83E-06        | -7.305                 | 1.97E-04 | 16.284      | 4.26E-03               | 7.240       | —         | —           | b          |
| Tnfrsf11a                                                                                                                      | 8.22E-03              | 3.492                  | —               | —                      | 4.40E-02 | 1.158       | 1.96E-02               | 6.298       | —         | —           | n          |
| Tnfrsf19                                                                                                                       | 9.98E-03              | 3.396                  | 6.45E-03        | -3.637                 | 4.54E-04 | 13.815      | 1.10E-02               | 6.560       | —         | —           | n          |

| [Overlapped between hepatocellular adenoma in C3H mice and liver in chimeric mice with human hepatocytes but not in CD-1 mice] |                       |                        |                 |                        |          |             |                        |             |               |             |            |
|--------------------------------------------------------------------------------------------------------------------------------|-----------------------|------------------------|-----------------|------------------------|----------|-------------|------------------------|-------------|---------------|-------------|------------|
| Gene                                                                                                                           | C3H mice (Hyper-5hmC) |                        |                 | C3H mice (Hypo-5hmC)   |          |             | C3H mice (Upregulated) |             | Chimeric mice |             | Agilent GO |
| Symbol                                                                                                                         | p-value(region)       | MAT-score <sup>1</sup> | p-value(region) | MAT-score <sup>1</sup> | p-value  | Fold-Change | p-value                | Fold-Change | p-value       | Fold-Change |            |
| 9630033F20Rl                                                                                                                   | 2.99E-03              | 3.986                  | —               | —                      | 2.24E-02 | 2.415       | C12orf5                | 3.12E-02    | 2.712         | —           | n          |
| Akr1b10                                                                                                                        | 4.63E-03              | 3.751                  | —               | —                      | 1.40E-02 | 1.734       | AKR1B10                | 2.20E-02    | 26.439        | —           | n          |
| Aox1                                                                                                                           | —                     | —                      | 8.80E-03        | -3.474                 | 1.92E-04 | 2.143       | AOX1                   | 5.00E-04    | 2.520         | —           | n          |
| Cyp11a1                                                                                                                        | —                     | —                      | 8.83E-06        | -6.137                 | 6.51E-03 | 3.414       | CYP11A1                | 3.35E-02    | 2.493         | —           | n          |
| D1Ertd22e                                                                                                                      | 5.67E-03              | 3.654                  | 8.92E-06        | -6.950                 | 8.50E-03 | 1.518       | C5orf90                | 3.47E-03    | 2.069         | —           | n          |
| Dennd2d                                                                                                                        | 8.92E-03              | 3.449                  | 1.41E-04        | -5.222                 | 3.00E-03 | 1.597       | DENND2D                | 2.87E-03    | 2.113         | —           | n          |
| Hsp90aa1                                                                                                                       | —                     | —                      | 9.59E-03        | -3.433                 | 3.51E-02 | 1.690       | HSP90AA1               | 4.81E-03    | 2.186         | —           | n          |
| Htatip2                                                                                                                        | —                     | —                      | 1.80E-03        | -4.237                 | 1.07E-02 | 2.426       | HTATIP2                | 1.41E-03    | 2.289         | —           | n          |
| Mras                                                                                                                           | —                     | —                      | 1.94E-04        | -5.120                 | 5.66E-04 | 3.114       | MRAS                   | 3.48E-02    | 2.520         | —           | n          |
| Pir                                                                                                                            | 6.64E-03              | 3.581                  | —               | —                      | 7.38E-03 | 2.223       | PIR                    | 1.43E-02    | 2.110         | —           | n          |
| Sgk2                                                                                                                           | —                     | —                      | 8.83E-06        | -8.163                 | 6.66E-03 | 2.319       | SGK2                   | 1.62E-02    | 2.386         | —           | n          |
| Srxn1                                                                                                                          | —                     | —                      | 4.88E-03        | -3.764                 | 4.10E-02 | 3.368       | SRXN1                  | 1.39E-02    | 2.360         | —           | n          |
| Tkt                                                                                                                            | —                     | —                      | 4.47E-03        | -3.803                 | 3.65E-04 | 1.616       | TKT                    | 6.05E-03    | 2.841         | —           | n          |
| Tmem164                                                                                                                        | 2.39E-03              | 4.098                  | —               | —                      | 3.01E-02 | 1.567       | TMEM164                | 1.72E-02    | 2.076         | —           | n          |
| Ugdh                                                                                                                           | 2.73E-03              | 4.034                  | 5.91E-04        | -4.719                 | 1.37E-03 | 2.105       | UGDH                   | 2.29E-03    | 3.302         | —           | n          |
| Ugt1a6b                                                                                                                        | —                     | —                      | 8.83E-06        | -7.457                 | 5.42E-03 | 1.679       | UGT1A6                 | 5.00E-04    | 4.186         | —           | n          |

| [Overlapped between hepatocellular adenoma in C3H mice, liver in CD-1 mice and in chimeric mice with human hepatocytes] |                       |                        |                 |                        |          |             |                        |             |           |             |        |               |             |            |
|-------------------------------------------------------------------------------------------------------------------------|-----------------------|------------------------|-----------------|------------------------|----------|-------------|------------------------|-------------|-----------|-------------|--------|---------------|-------------|------------|
| Gene                                                                                                                    | C3H mice (Hyper-5hmC) |                        |                 | C3H mice (Hypo-5hmC)   |          |             | C3H mice (Upregulated) |             | CD-1 mice |             | Gene   | Chimeric mice |             | Agilent GO |
| Symbol                                                                                                                  | p-value(region)       | MAT-score <sup>1</sup> | p-value(region) | MAT-score <sup>1</sup> | p-value  | Fold-Change | p-value                | Fold-Change | p-value   | Fold-Change | Symbol | p-value       | Fold-Change |            |
| Cyp2a4                                                                                                                  | —                     | —                      | 4.93E-03        | -3.758                 | 3.06E-05 | 3.940       | 4.08E-02               | 17.942      | CYP2A7    | 8.58E-04    | 5.251  | —             | n           |            |
| Cyp2b10                                                                                                                 | —                     | —                      | 8.83E-06        | -9.137                 | 3.58E-05 | 53.304      | 3.49E-02               | 118.828     | CYP2B6    | 1.57E-04    | 7.148  | —             | n           |            |
| Ephx1                                                                                                                   | —                     | —                      | 1.65E-03        | -4.273                 | 4.95E-04 | 2.227       | 3.06E-02               | 2.985       | EPHX1     | 1.04E-04    | 2.475  | —             | n           |            |
| Gstm2                                                                                                                   | —                     | —                      | 2.07E-03        | -4.167                 | 5.48E-04 | 8.472       | 1.68E-02               | 10.352      | GSTM1     | 1.88E-02    | 3.951  | —             | n           |            |

| [Overlapped between liver in CD-1 mice and chimeric mice with human hepatocytes but not hepatocellular adenoma in C3H mice] |           |             |              |               |             |      |               |             |   |            |
|-----------------------------------------------------------------------------------------------------------------------------|-----------|-------------|--------------|---------------|-------------|------|---------------|-------------|---|------------|
| Gene                                                                                                                        | CD-1 mice |             |              | Chimeric mice |             |      | Chimeric mice |             |   | Agilent GO |
| Symbol                                                                                                                      | p-value   | Fold-Change | Gene (human) | p-value       | Fold-Change | Gene | p-value       | Fold-Change |   |            |
| Cyp2c54                                                                                                                     | 1.26E-02  | 7.972       | CYP2C19      | 4.64E-04      | 2.225       | —    | —             | —           | — | n          |
| Cyp3a16                                                                                                                     | 1.14E-02  | 3.354       | CYP3A4       | 2.37E-04      | 3.169       | —    | —             | —           | — | n          |
| Gtdc1                                                                                                                       | 1.21E-02  | 2.440       | GTDC1        | 1.99E-04      | 6.582       | —    | —             | —           | — | n          |
| Mpv17l                                                                                                                      | 4.07E-02  | 2.422       | MPV17L       | 2.72E-02      | 2.000       | —    | —             | —           | — | n          |
| Tfrc                                                                                                                        | 4.88E-03  | 2.333       | TFRC         | 1.07E-03      | 2.949       | —    | —             | —           | — | n          |

<sup>1</sup>The relative methylation level calculated by the MAT (Model based Analysis of Tiling-arrays) algorithm

—: No change

a: With the Gene Ontology (GO) term "cell proliferation" and/or its lower tiers

b: With the GO term "regulation of cell proliferation" and/or its lower tiers

c: With the GO term "cell growth" and/or its lower tiers

d: With the GO term "regulation of cell growth" and/or its lower tiers

n: Without any of the GO term above

Table S7. Overlap between hyper-5mC & down-regulated genes of hepatocellular adenoma induced by DEN/PB in C3H mice, down-regulated genes of liver induced by PB in CD-1 mice and/or in chimeric mice with human hepatocytes (Yamada et al., 2014).

**[Overlapped between hepatocellular adenoma in C3H mice and liver in CD-1 mice but not in chimeric mice with human hepatocytes]**

| Gene Symbol<br>(mouse) | C3H mice (Hyper-5mC) |                        | C3H mice (Downregulated) |             | CD-1 mice |             | Agilent GO |
|------------------------|----------------------|------------------------|--------------------------|-------------|-----------|-------------|------------|
|                        | p-value(region)      | MAT-score <sup>†</sup> | p-value                  | Fold-Change | p-value   | Fold-Change |            |
| 9330151L19R            | 5.82E-03             | 3.234                  | 4.54E-03                 | -2.487      | 2.29E-02  | -2.524      | n          |
| 9930021J03R            | 6.00E-04             | 4.124                  | 2.02E-02                 | -1.452      | 2.38E-02  | -2.255      | n          |
| Acat1                  | 4.68E-04             | 4.220                  | 2.51E-03                 | -1.576      | 7.97E-03  | -2.149      | n          |
| Adrb3                  | 5.65E-04             | 4.157                  | 4.23E-02                 | -2.049      | 2.01E-02  | -2.788      | n          |
| Aox3                   | 5.23E-03             | 3.283                  | 1.28E-02                 | -1.625      | 1.14E-03  | -3.852      | n          |
| Apoa1                  | 3.91E-03             | 3.404                  | 2.36E-03                 | -1.483      | 2.67E-02  | -2.126      | a          |
| C8a                    | 3.34E-03             | 3.453                  | 4.36E-02                 | -3.422      | 2.26E-03  | -2.093      | n          |
| Cacna2d2               | 7.71E-03             | 3.120                  | 6.31E-03                 | -1.448      | 1.75E-02  | -2.946      | n          |
| Cdk5r1                 | 2.56E-04             | 4.551                  | 2.43E-02                 | -1.214      | 1.34E-02  | -2.210      | d          |
| Ctrl                   | 5.22E-03             | 3.283                  | 3.42E-02                 | -1.469      | 2.30E-03  | -2.130      | n          |
| Dlq1                   | 5.39E-03             | 3.265                  | 9.79E-03                 | -1.560      | 4.02E-02  | -2.026      | a, b       |
| Egfr                   | 2.65E-04             | 4.492                  | 3.18E-02                 | -3.202      | 4.54E-03  | -2.848      | a, b       |
| Enho                   | 3.71E-04             | 4.335                  | 3.31E-02                 | -12.837     | 2.28E-02  | -2.996      | n          |
| Fat2                   | 7.43E-03             | 3.130                  | 4.35E-02                 | -1.478      | 2.19E-03  | -2.437      | n          |
| Gpatch8                | 7.87E-03             | 3.112                  | 5.35E-03                 | -1.458      | 3.63E-02  | -2.197      | n          |
| Hectd2                 | 5.31E-03             | 3.277                  | 4.14E-02                 | -1.587      | 1.90E-05  | -4.577      | n          |
| Hsd17b6                | 5.71E-03             | 3.241                  | 4.91E-02                 | -9.256      | 1.48E-02  | -2.865      | n          |
| Nsa2                   | 8.85E-03             | 3.058                  | 3.07E-02                 | -1.213      | 3.57E-03  | -2.164      | n          |
| Olfir638               | 6.61E-03             | 3.176                  | 2.72E-02                 | -1.451      | 1.26E-02  | -3.987      | n          |
| Siglech                | 1.16E-03             | 3.862                  | 3.65E-02                 | -3.400      | 1.30E-02  | -4.184      | n          |
| Slc22a7                | 9.54E-03             | 3.025                  | 2.06E-02                 | -7.142      | 7.04E-03  | -4.292      | n          |
| Snora47                | 6.29E-03             | 3.202                  | 9.11E-03                 | -3.444      | 2.70E-03  | -2.503      | n          |
| Tmem116                | 8.90E-03             | 3.056                  | 1.11E-06                 | -1.408      | 8.04E-03  | -2.086      | n          |

**[Overlapped between hepatocellular adenoma in C3H mice and liver in chimeric mice with human hepatocytes but not in CD-1 mice]**

| Gene Symbol<br>(mouse) | C3H mice (Hyper-5mC) |                        | C3H mice (Downregulated) |             | Chimeric mice |          | Agilent GO |             |
|------------------------|----------------------|------------------------|--------------------------|-------------|---------------|----------|------------|-------------|
|                        | p-value(region)      | MAT-score <sup>†</sup> | p-value                  | Fold-Change | (human)       | p-value  |            | Fold-Change |
| Pnmt                   | 6.51E-03             | 3.183                  | 6.65E-04                 | -2.978      | PNMT          | 3.97E-02 | -6.414     | n           |

**[Overlapped between liver in CD-1 mice and chimeric mice with human hepatocytes but not hepatocellular adenoma in C3H mice]**

| Gene Symbol<br>(mouse) | CD-1 mice |             | Gene Symbol<br>(human) | Chimeric mice |             | Agilent GO |
|------------------------|-----------|-------------|------------------------|---------------|-------------|------------|
|                        | p-value   | Fold-Change |                        | p-value       | Fold-Change |            |
| Col5a3                 | 3.09E-02  | -2.383      | COL5A3                 | 3.15E-02      | -3.124      | n          |

<sup>†</sup>The relative methylation level calculated by the MAT (Model based Analysis of Tiling-arrays) algorithm

a: With the Gene Ontology (GO) term "cell proliferation" and/or its lower tiers

b: With the GO term "regulation of cell proliferation" and/or its lower tiers

c: With the GO term "cell growth" and/or its lower tiers

d: With the GO term "regulation of cell growth" and/or its lower tiers

n: Without any of the GO term above
